# Supplementary material for: Impact of Acetaldehyde Addition on the Sensory Perception of Syrah Red Wines
Source: MDPI journal article supplement (doi:10.3390/foods11121693), 2022-06-09
Supplement: s1 [file s1]

## SUPPLEMENTARY INFORMATION

# Impact of acetaldehyde addition on sensory perception of Syrah red wines

Luca Garcia, Cédrine Perrin, Valérie Nolleau, Teddy Godet, Vincent Farines, François Garcia,  
Soline Caillé and Cédric Saucier

### Table of contents

|                                                                                                                                                                                                                                                                                           | Page |
|-------------------------------------------------------------------------------------------------------------------------------------------------------------------------------------------------------------------------------------------------------------------------------------------|------|
| <b>Table S1.</b> Olfactory standards for panel training                                                                                                                                                                                                                                   | S-2  |
| <b>Table S2.</b> Detailed concentration of monomeric anthocyanins.<br>Concentrations are expressed in mg.L <sup>-1</sup> of Malvidin-3-O-glucoside equivalent. Values represent means of triplicate determination ± Standard Deviation                                                    | S-4  |
| <b>Table S3.</b> Detailed concentration of flavanols after phloroglucinolysis.<br>Concentrations are expressed in g.L <sup>-1</sup> of each compound estimated using their response factors relative to catechin. Values represent means of triplicate determination ± Standard Deviation | S-4  |
| <b>Table S4.</b> Reproducibility index and panel performance.                                                                                                                                                                                                                             | S-5  |

**Table S1:** Olfactory standards for panel training.

| Family             | Subfamily      | Descriptors           | product added to a syrah wine for the<br>realisation of olfactory standards |                |
|--------------------|----------------|-----------------------|-----------------------------------------------------------------------------|----------------|
| Fruity             | Red berries    | Strawberry            | crushed strawberries                                                        |                |
|                    |                | Blackcurrant          | blackcurrant berries, blackcurrant<br>liquor                                |                |
|                    |                | Blackberry            | blackberry berries, blackberry liquor                                       |                |
|                    |                | Raspberry             | raspberry berries, raspberry liquor                                         |                |
|                    | Stewed fruit   | Prune                 | prune juice                                                                 |                |
|                    |                | Jam                   | red fruit jam                                                               |                |
|                    |                | Baked apple           | baked apple pieces                                                          |                |
|                    | Dry fruit      | Coconut               | wiskey lactone                                                              |                |
|                    |                | Hazelnut              | hazelnut powder                                                             |                |
|                    |                | Nut                   | nut powder                                                                  |                |
|                    |                | Dried Fig             | pieces of dried figs                                                        |                |
|                    | Overripe fruit | Overripe<br>apples    | overripe apples pieces                                                      |                |
| Floral             | Fresh flowers  | Violet                | alpha-ionone solution                                                       |                |
|                    |                | White flowers         | linalol solution                                                            |                |
|                    |                | Rose                  | rose hydrolate                                                              |                |
|                    | Dried flowers  | Faded roses           | rose petal powder                                                           |                |
| Vegetal            | Fresh plant    | Grass                 | fresh cut grass                                                             |                |
|                    |                | Fresh green<br>apples | green apple, granny variety                                                 |                |
|                    |                | Peppers               | pieces of peppers green and red                                             |                |
|                    | Dry plant      | Tobacco               | blond tobacco                                                               |                |
|                    |                | Black tea             | black tea                                                                   |                |
|                    |                | Humus                 | humus                                                                       |                |
|                    | Undergrowth    | Truffle               | white truffle vinegar                                                       |                |
|                    |                | Mushroom              | 2 octanol solution, piece of mushroom                                       |                |
|                    | Spicy          | Spicy                 | Licorice                                                                    | licorice candy |
|                    |                |                       | Clove                                                                       | clove powder   |
| Black pepper       |                |                       | black pepper                                                                |                |
| Nutmeg             |                |                       | nutmeg powder                                                               |                |
| Aromatic<br>plants |                | Thyme                 | thyme powder                                                                |                |
|                    |                | Laurel                | laurel leaf                                                                 |                |
|                    |                | Eucalyptus            | eucalyptus essential oil                                                    |                |
|                    |                | Black olive           | pieces of black olives                                                      |                |
|                    |                | Mint                  | mint leaves                                                                 |                |
|                    |                | Anise                 | green aniseed powder                                                        |                |
| Pastry             | Pastry         | Vanilla               | vanilla powder                                                              |                |
|                    |                | Cinnamon              | cinnamon powder                                                             |                |

|                     |              |                      |                                              |
|---------------------|--------------|----------------------|----------------------------------------------|
|                     |              | Brioche              | pieces of brioche                            |
|                     |              | Biscuit              | piece of butter biscuit                      |
|                     |              | Pastry spices        | 4-spice mixture                              |
|                     |              | Praline              | praline splinters                            |
|                     | Yeast        | Malt                 | brewer's yeast                               |
| <b>Animal</b>       | Animal       | Leather              | éthyl-4-phenol solution                      |
|                     |              | Meat juice           | 2 methyl 3 furanthiol solution               |
| <b>Lactic</b>       | Lactic       | Fresh butter         | melted butter                                |
|                     |              | Rancid butter        | melted rancid butter                         |
|                     |              | Milk                 | condensed milk, fermented milk               |
| <b>Empyreumatic</b> | Empyreumatic | Cocoa                | cocoa powder                                 |
|                     |              | Chocolate            | dark chocolate chips                         |
|                     |              | Coffee               | coffee powder                                |
|                     |              | Smoked, Burnt        | smoked food flavouring                       |
|                     |              | Toasted bread        | pieces of toasted bread                      |
|                     |              | Caramel              | liquid caramel                               |
| <b>Chemical</b>     | Amylic       | Candy                | isoamyl acetate solution                     |
|                     |              | Banana               | banana candy                                 |
|                     | Chemical     | Nail polish remover  | nail polish remover                          |
|                     |              | Varnish              | isoamyl acetate solution                     |
|                     | Oxidized     | Oxidized green apple | green apple cut and left to air for 24 hours |
|                     |              | Sweet wine           | sweet grenache wine                          |
|                     | Sulfur       | Tar                  | Heated tar                                   |
|                     |              | Sulphur              | burnt sulphur wick                           |

**Table S2.** Detailed concentration of monomeric anthocyanins. Concentrations are

| Judges | Syrah 1                |      | Syrah 2                |      | Judge performance |
|--------|------------------------|------|------------------------|------|-------------------|
|        | Number of terms listed | Ri   | Number of terms listed | Ri   |                   |
| n°1    | 70                     | 0.27 | 50                     | 0.30 | **                |
| n°2    | 93                     | 0.37 | 85                     | 0.50 | ***               |
| n°3    | 47                     | 0.30 | 51                     | 0.13 | *                 |
| n°4    | 61                     | 0.20 | 76                     | 0.14 | *                 |
| n°5    | 78                     | 0.27 | 70                     | 0.26 | **                |
| n°6    | 87                     | 0.46 | 81                     | 0.39 | ***               |
| n°7    | 80                     | 0.53 | 81                     | 0.34 | ***               |
| n°8    | 57                     | 0.37 | 59                     | 0.28 | **                |
| n°9    | 79                     | 0.26 | 77                     | 0.42 | ***               |
| n°10   | 81                     | 0.41 | 77                     | 0.43 | ***               |
| n°12   | 70                     | 0.16 | 60                     | 0.28 | *                 |
| n°13   | 18                     | 0.31 | 19                     | 0.25 | *                 |

expressed in mg.L<sup>-1</sup> of Malvidin-3-O-glucoside equivalent. Values represent means of triplicate determination  $\pm$  Standard Deviation.

**Table S3** Detailed concentration of flavanols after phloroglucinolysis. Concentrations are expressed in g.L<sup>-1</sup> of each compound estimated using their response factors relative to catechin. Values represent means of triplicate determination  $\pm$  Standard Deviation.

|    |                          |                         |                          |                         |                         |
|----|--------------------------|-------------------------|--------------------------|-------------------------|-------------------------|
| S1 | Delphidin 3 O Glu        | Cyanidin 3 O Glu        | Petunidin 3 O Glu        | Peonidin 3 O Glu        | Malvidin 3 O Glu        |
|    | 7.65 $\pm$ 0.04          | 1.06 $\pm$ 0.06         | 10.60 $\pm$ 0.38         | 19.68 $\pm$ 0.15        | 108.35 $\pm$ 0.38       |
|    | Delphidin 3 O acetyl Glu | Cyanidin 3 O acetyl Glu | Petunidin 3 O acetyl Glu | Peonidin 3 O acetyl Glu | Malvidin 3 O acetyl Glu |
|    | 1.26 $\pm$ 0.15          | 0.18 $\pm$ 0.03         | 8.54 $\pm$ 0.07          | 8.56 $\pm$ 0.06         | 30.29 $\pm$ 0.17        |
| S2 | Cyanidin 3 O coum Glu    | Petunidin 3 O coum Glu  | Peonidin 3 O coum Glu    | Malvidin 3 O coum Glu   |                         |
|    | 0.44 $\pm$ 0.04          | 1.39 $\pm$ 0.3          | 5.47 $\pm$ 0.03          | 19.74 $\pm$ 0.23        |                         |
|    | Delphidin 3 O Glu        | Cyanidin 3 O Glu        | Petunidin 3 O Glu        | Peonidin 3 O Glu        | Malvidin 3 O Glu        |
|    | 20.39 $\pm$ 0.84         | 3.54 $\pm$ 0.2          | 29.60 $\pm$ 0.18         | 59.47 $\pm$ 0.25        | 231.14 $\pm$ 0.51       |
|    | Delphidin 3 O acetyl Glu | Cyanidin 3 O acetyl Glu | Petunidin 3 O acetyl Glu | Peonidin 3 O acetyl Glu | Malvidin 3 O acetyl Glu |
|    | 3.44 $\pm$ 0.25          | 0.79 $\pm$ 0.21         | 19.09 $\pm$ 0.13         | 21.09 $\pm$ 0.1         | 71.02 $\pm$ 0.07        |
|    | Cyanidin 3 O coum Glu    | Petunidin 3 O coum Glu  | Peonidin 3 O coum Glu    | Malvidin 3 O coum Glu   |                         |
|    | 2.18 $\pm$ 0.1           | 5.28 $\pm$ 0.5          | 14.32 $\pm$ 0.08         | 31.26 $\pm$ 0.13        |                         |

**Table S4:** Reproducibility index and panel performance.

|           | Gallocatechin-phloroglucinol | Catechin-phloroglucinol | Epicatechin-phloroglucinol | Catechin     | Epicatechin gallate-phloroglucinol | Epicatechin  | Gallocatechin | Epicatechin gallate | Total flavanols |
|-----------|------------------------------|-------------------------|----------------------------|--------------|------------------------------------|--------------|---------------|---------------------|-----------------|
| <b>S1</b> | 0.19 ± 0.02                  | 0.02 ± 0.008            | 0.10 ± 0.01                | 0.07 ± 0.003 | 0.11 ± 0.01                        | 0.04 ± 0.001 | 0.12 ± 0.01   | 0.04 ± 0.001        | 0.69 ± 0.04     |
| <b>S2</b> | 0.21 ± 0.01                  | 0.03 ± 0.006            | 0.35 ± 0.02                | 0.12 ± 0.002 | 0.12 ± 0.015                       | 0.08 ± 0.003 | 0.27 ± 0.03   | 0.09 ± 0.002        | 1.28 ± 0.05     |

\*\*\*: very performant judges (a lot of cited and repeated terms); \*\*: judges with a rather good overall performance; \*: less performant judges
